# Supplementary material for: Identification of Prognostic Stromal-Immune Score–Based Genes in Hepatocellular Carcinoma Microenvironment
Source: Front Genet. 2021 Feb 11;12:625236. doi: 10.3389/fgene.2021.625236 (PMC7905188; doi:10.3389/fgene.2021.625236)
Supplement: Supplementary file 6 [file Table_2.XLSX]

## Sheet: Supplementary Table 2
Supplementary Table 2. The immune scores and stromal scores of LIHC
ID	StromalScore	ImmuneScore	ESTIMATEScore	TumorPurity
TCGA-2Y-A9GS	-604.929	-0.253169	-605.182	0.869724
TCGA-2Y-A9GT	-258.46	822.736	564.276	0.772634
TCGA-2Y-A9GU	-1059.96	-729.493	-1789.45	0.94198
TCGA-2Y-A9GV	-232.663	221.069	-11.5938	0.823476
TCGA-2Y-A9GW	-114.373	780.001	665.628	0.763104
TCGA-2Y-A9GX	572.225	957.491	1529.72	0.675221
TCGA-2Y-A9GY	-1081.29	1038.51	-42.7872	0.826065
TCGA-2Y-A9GZ	-1048.52	-912.006	-1960.53	0.950111
TCGA-2Y-A9H0	-1177.44	88.1801	-1089.26	0.902569
TCGA-2Y-A9H1	-992.125	456.104	-536.021	0.864669
TCGA-2Y-A9H2	-1107	-56.135	-1163.14	0.907185
TCGA-2Y-A9H3	-303.64	1089.17	785.529	0.751612
TCGA-2Y-A9H4	-923.15	-61.1601	-984.31	0.89583
TCGA-2Y-A9H5	-408.108	-345.665	-753.774	0.880281
TCGA-2Y-A9H6	-154.704	346.715	192.011	0.806155
TCGA-2Y-A9H7	-1281.27	-342.618	-1623.89	0.933545
TCGA-2Y-A9H8	-1019.17	220.451	-798.717	0.883392
TCGA-2Y-A9H9	-758.708	-271.058	-1029.77	0.898775
TCGA-2Y-A9HA	-1075.65	-621.032	-1696.68	0.937321
TCGA-2Y-A9HB	-351.323	267.018	-84.3053	0.829485
TCGA-3K-AAZ8	-1115.54	-167.488	-1283.03	0.914448
TCGA-4R-AA8I	-841.016	-429.131	-1270.15	0.913682
TCGA-5C-A9VG	-552.217	-879.154	-1431.37	0.923043
TCGA-5C-A9VH	-398.093	-520.998	-919.092	0.891534
TCGA-5C-AAPD	-472.296	1031.87	559.577	0.773072
TCGA-5R-AA1C	-986.559	-220.189	-1206.75	0.90986
TCGA-5R-AA1D	1114.93	319.919	1434.84	0.685427
TCGA-5R-AAAM	371.789	426.853	798.641	0.750341
TCGA-BC-4072	-432.752	589.989	157.237	0.809164
TCGA-BC-4073	-119.681	1158.42	1038.74	0.726582
TCGA-BC-A10Q	-825.926	-304.133	-1130.06	0.905131
TCGA-BC-A10R	-188.149	-526.053	-714.202	0.87751
TCGA-BC-A10S	-97.0541	438.902	341.848	0.792946
TCGA-BC-A10T	17.3632	-417.335	-399.972	0.854465
TCGA-BC-A10U	-1317.12	-527.407	-1844.53	0.944663
TCGA-BC-A10W	-670	-36.8887	-706.888	0.876995
TCGA-BC-A10X	240.61	174.224	414.834	0.786373
TCGA-BC-A10Y	-933.689	-183.612	-1117.3	0.904334
TCGA-BC-A10Z	-1520.71	-1145.3	-2666.01	0.977264
TCGA-BC-A110	526.907	882.479	1409.39	0.688144
TCGA-BC-A112	-406.59	-168.963	-575.553	0.867569
TCGA-BC-A216	-1049.58	149.288	-900.296	0.890281
TCGA-BC-A217	-1189.24	-41.2046	-1230.45	0.911297
TCGA-BC-A3KF	-891.749	-591.263	-1483.01	0.925933
TCGA-BC-A3KG	-1346.75	-652.367	-1999.12	0.951863
TCGA-BC-A5W4	-1537.77	-1089.84	-2627.61	0.976053
TCGA-BC-A69H	-955.882	270.492	-685.39	0.875474
TCGA-BC-A69I	-389.147	-153.079	-542.226	0.865126
TCGA-BC-A8YO	-980.862	558.405	-422.457	0.856175
TCGA-BD-A2L6	-812.661	-316.218	-1128.88	0.905058
TCGA-BD-A3EP	-16.9492	739.818	722.868	0.757647
TCGA-BD-A3ER	-32.0459	-20.2317	-52.2776	0.82685
TCGA-BW-A5NO	-811.637	-193.068	-1004.7	0.897156
TCGA-CC-5258	-625.786	-13.551	-639.337	0.872187
TCGA-CC-5259	-1433	-25.5013	-1458.5	0.924568
TCGA-CC-5260	-120.612	36.1336	-84.4783	0.829499
TCGA-CC-5261	-75.2236	403.555	328.332	0.794154
TCGA-CC-5262	63.1401	435.598	498.738	0.778706
TCGA-CC-5263	-851.097	-10.9843	-862.082	0.887713
TCGA-CC-5264	-1093.65	-446.057	-1539.71	0.929044
TCGA-CC-A123	-950.342	-279.796	-1230.14	0.911279
TCGA-CC-A1HT	48.2028	1381.68	1429.88	0.685958
TCGA-CC-A3M9	807.601	2318.14	3125.74	0.485545
TCGA-CC-A3MA	-583.179	-635.126	-1218.31	0.910562
TCGA-CC-A3MB	-1021.03	-520.502	-1541.54	0.929143
TCGA-CC-A3MC	-613.229	-265.244	-878.473	0.888818
TCGA-CC-A5UC	-413.717	-318.315	-732.032	0.878762
TCGA-CC-A5UD	-1257.92	-719.087	-1977	0.950863
TCGA-CC-A5UE	-1630.45	-576.941	-2207.39	0.960787
TCGA-CC-A7IE	-778.8	510.783	-268.018	0.844243
TCGA-CC-A7IF	-1160.55	-837.148	-1997.7	0.951799
TCGA-CC-A7IG	-1083.88	-97.477	-1181.36	0.908307
TCGA-CC-A7IH	-1021.06	-914.13	-1935.19	0.948945
TCGA-CC-A7II	-881.505	-974.739	-1856.24	0.945225
TCGA-CC-A7IJ	709.707	1229.84	1939.55	0.629653
TCGA-CC-A7IK	-1357.9	-1042.65	-2400.55	0.968262
TCGA-CC-A7IL	-1627.52	-858.828	-2486.35	0.971333
TCGA-CC-A8HS	-1202.26	-957.659	-2159.92	0.958832
TCGA-CC-A8HT	-1131.42	99.6109	-1031.81	0.898906
TCGA-CC-A8HU	-1300.5	-741.91	-2042.41	0.953792
TCGA-CC-A8HV	-1286.72	-937.33	-2224.05	0.961463
TCGA-CC-A9FS	-993.034	-548.793	-1541.83	0.929159
TCGA-CC-A9FW	-1420.06	-494.467	-1914.53	0.947983
TCGA-DD-A113	-786.298	-136.714	-923.011	0.891795
TCGA-DD-A114	179.564	1068.69	1248.26	0.705111
TCGA-DD-A115	-432.012	-191.917	-623.928	0.871079
TCGA-DD-A116	-774.219	-203	-977.219	0.895367
TCGA-DD-A118	-435.323	-459.132	-894.455	0.88989
TCGA-DD-A119	-488.173	-297.635	-785.808	0.882502
TCGA-DD-A11A	-1104.64	-741.673	-1846.31	0.944749
TCGA-DD-A11B	-916.974	-778.395	-1695.37	0.937254
TCGA-DD-A11C	-172.22	-117.41	-289.63	0.845939
TCGA-DD-A11D	-726.779	-469.666	-1196.45	0.909231
TCGA-DD-A1EA	-990.401	143.421	-846.98	0.88669
TCGA-DD-A1EB	-635.875	-406.565	-1042.44	0.899589
TCGA-DD-A1EC	-320.052	1761.95	1441.9	0.684673
TCGA-DD-A1ED	-219.295	427.527	208.232	0.804743
TCGA-DD-A1EE	-1095.96	-706.368	-1802.33	0.942612
TCGA-DD-A1EF	-755.382	-58.5813	-813.964	0.884439
TCGA-DD-A1EG	-163.528	683.385	519.857	0.776757
TCGA-DD-A1EH	-552.532	-644.928	-1197.46	0.909293
TCGA-DD-A1EI	-113.11	-168.252	-281.362	0.845291
TCGA-DD-A1EJ	-1134.85	-285.514	-1420.36	0.92242
TCGA-DD-A1EK	-429.798	146.566	-283.233	0.845438
TCGA-DD-A1EL	-1420.82	-360.363	-1781.18	0.941572
TCGA-DD-A39V	-574.939	704.403	129.464	0.811553
TCGA-DD-A39W	-1042.07	-595.073	-1637.14	0.93424
TCGA-DD-A39X	-566.145	-89.7365	-655.882	0.873373
TCGA-DD-A39Y	-1282.68	-545.564	-1828.24	0.943876
TCGA-DD-A39Z	-1476.58	-753.438	-2230.02	0.961703
TCGA-DD-A3A1	-1180.62	221.252	-959.366	0.894196
TCGA-DD-A3A2	-644.434	-445.357	-1089.79	0.902603
TCGA-DD-A3A3	-1480.96	-292.035	-1773	0.941166
TCGA-DD-A3A4	-929.874	-898.607	-1828.48	0.943887
TCGA-DD-A3A5	-772.762	-447.695	-1220.46	0.910693
TCGA-DD-A3A6	653.961	667.72	1321.68	0.697428
TCGA-DD-A3A7	-1234.79	-276.403	-1511.19	0.927487
TCGA-DD-A3A8	-1204.79	-701.461	-1906.25	0.947596
TCGA-DD-A3A9	-183.976	174.488	-9.48856	0.823301
TCGA-DD-A4NA	-509.289	-19.6557	-528.945	0.864147
TCGA-DD-A4NB	859.856	165.847	1025.7	0.727895
TCGA-DD-A4ND	488.524	404.884	893.407	0.741073
TCGA-DD-A4NE	-782.788	-683.303	-1466.09	0.924992
TCGA-DD-A4NF	-891.074	-859.016	-1750.09	0.940024
TCGA-DD-A4NG	-933.874	-163.539	-1097.41	0.903084
TCGA-DD-A4NH	-700.761	294.849	-405.912	0.854918
TCGA-DD-A4NI	-207.723	324.175	116.453	0.812667
TCGA-DD-A4NJ	-267.043	240.672	-26.3709	0.824705
TCGA-DD-A4NK	-772.443	-621.176	-1393.62	0.920897
TCGA-DD-A4NL	-296.153	-210.542	-506.695	0.862498
TCGA-DD-A4NN	-935.85	-891.01	-1826.86	0.943809
TCGA-DD-A4NO	-451.972	-422.168	-874.141	0.888526
TCGA-DD-A4NP	-802.539	-404.569	-1207.11	0.909882
TCGA-DD-A4NQ	-1042.41	-19.0615	-1061.47	0.900805
TCGA-DD-A4NR	42.48	1643.02	1685.5	0.658178
TCGA-DD-A4NS	453.424	453.017	906.441	0.739787
TCGA-DD-A4NV	-282.53	-365.736	-648.267	0.872828
TCGA-DD-A73A	-1004.53	143.694	-860.836	0.887628
TCGA-DD-A73B	-1210.6	-803.211	-2013.81	0.952522
TCGA-DD-A73C	-211.973	-382.716	-594.689	0.868963
TCGA-DD-A73D	-1584.29	-1059.94	-2644.23	0.976581
TCGA-DD-A73E	-1210.29	-1193.42	-2403.71	0.968378
TCGA-DD-A73F	-257.408	1104.77	847.365	0.745594
TCGA-DD-A73G	-815.787	-21.1793	-836.966	0.886009
TCGA-DD-AA3A	-1621.42	-542.312	-2163.73	0.958991
TCGA-DD-AAC8	-1042.44	-142.924	-1185.37	0.908553
TCGA-DD-AAC9	-1.16159	389.599	388.437	0.788761
TCGA-DD-AACA	-1124.73	-699.722	-1824.45	0.943692
TCGA-DD-AACB	-823.922	732.303	-91.6189	0.830084
TCGA-DD-AACC	-38.6381	2075.12	2036.49	0.618535
TCGA-DD-AACD	-513.156	386.486	-126.67	0.832942
TCGA-DD-AACE	-769.943	-548.039	-1317.98	0.916513
TCGA-DD-AACF	-1102.78	47.6973	-1055.09	0.900398
TCGA-DD-AACG	-1329.91	110.625	-1219.28	0.910622
TCGA-DD-AACH	-818.178	-239.809	-1057.99	0.900583
TCGA-DD-AACI	-350.227	1222.73	872.506	0.74313
TCGA-DD-AACJ	-1349.97	-538.284	-1888.25	0.946749
TCGA-DD-AACK	-1143.68	-439.622	-1583.3	0.931392
TCGA-DD-AACL	-629.427	1129.37	499.939	0.778595
TCGA-DD-AACN	-421.141	-252.568	-673.71	0.874644
TCGA-DD-AACO	-603.467	230.779	-372.687	0.852378
TCGA-DD-AACP	-1700.2	-876.611	-2576.81	0.974404
TCGA-DD-AACQ	-1541.19	-956.181	-2497.38	0.971717
TCGA-DD-AACS	-1282.51	-774.459	-2056.97	0.954431
TCGA-DD-AACT	-475.55	223.843	-251.706	0.842957
TCGA-DD-AACU	-800.901	-193.55	-994.451	0.89649
TCGA-DD-AACV	-1444.75	-1120.03	-2564.78	0.974006
TCGA-DD-AACW	-1200.56	-431.962	-1632.52	0.933998
TCGA-DD-AACX	-1406.45	-305.418	-1711.87	0.938096
TCGA-DD-AACY	-859.312	-269.935	-1129.25	0.905081
TCGA-DD-AACZ	-555.202	1385.75	830.547	0.747237
TCGA-DD-AAD0	-1485.94	-712.934	-2198.88	0.96044
TCGA-DD-AAD1	97.548	620.159	717.707	0.758141
TCGA-DD-AAD2	129.065	319.673	448.738	0.783289
TCGA-DD-AAD3	-74.265	83.1937	8.92868	0.821763
TCGA-DD-AAD5	-1056.34	325.54	-730.803	0.878676
TCGA-DD-AAD6	-1546.37	-499	-2045.37	0.953922
TCGA-DD-AAD8	-1077.48	-470.321	-1547.8	0.929483
TCGA-DD-AADA	-378.965	319.645	-59.3203	0.827431
TCGA-DD-AADB	-974.2	470.708	-503.492	0.86226
TCGA-DD-AADC	-1209.86	-717.572	-1927.43	0.948585
TCGA-DD-AADD	-1556	-611.347	-2167.34	0.959141
TCGA-DD-AADF	-1261.67	-306.583	-1568.25	0.930586
TCGA-DD-AADG	-1134.03	-900.063	-2034.09	0.953424
TCGA-DD-AADI	-372.594	876.125	503.531	0.778264
TCGA-DD-AADJ	-1132.61	-212.547	-1345.16	0.918101
TCGA-DD-AADK	-358.159	76.145	-282.014	0.845342
TCGA-DD-AADL	-1278.56	-886.208	-2164.76	0.959034
TCGA-DD-AADM	-724.819	-135.691	-860.51	0.887606
TCGA-DD-AADN	-1278.21	1448.78	170.566	0.808013
TCGA-DD-AADO	-940.294	787.709	-152.586	0.835041
TCGA-DD-AADP	-649.26	-291.399	-940.659	0.892964
TCGA-DD-AADQ	-1269.64	-88.6487	-1358.29	0.918863
TCGA-DD-AADR	-919.674	-126.15	-1045.82	0.899806
TCGA-DD-AADS	-829.623	770.349	-59.2747	0.827427
TCGA-DD-AADU	-1396.72	-550.45	-1947.17	0.949498
TCGA-DD-AADV	-503.784	-451.775	-955.559	0.893946
TCGA-DD-AADW	-606.73	-883.231	-1489.96	0.926318
TCGA-DD-AADY	-733.592	-833.647	-1567.24	0.930532
TCGA-DD-AAE0	-803.568	-586.842	-1390.41	0.920714
TCGA-DD-AAE1	-1195.41	-252.737	-1448.15	0.923988
TCGA-DD-AAE2	-303.849	245.158	-58.6908	0.827379
TCGA-DD-AAE3	-282.58	-219.391	-501.971	0.862147
TCGA-DD-AAE4	-81.2963	1122.92	1041.63	0.726291
TCGA-DD-AAE6	-1689.96	-1240.67	-2930.63	0.98476
TCGA-DD-AAE7	-358.961	115.254	-243.707	0.842325
TCGA-DD-AAE9	-1496.55	-495.503	-1992.05	0.951544
TCGA-DD-AAEA	-1138.26	-1.06403	-1139.32	0.905709
TCGA-DD-AAEB	-862.929	-309.886	-1172.81	0.907782
TCGA-DD-AAED	-1627.87	-406.803	-2034.67	0.953449
TCGA-DD-AAEE	-1060.29	-770.286	-1830.58	0.943989
TCGA-DD-AAEG	-1063.4	-728.58	-1791.98	0.942104
TCGA-DD-AAEH	-314.336	771.928	457.592	0.782481
TCGA-DD-AAEI	-757.691	152.336	-605.355	0.869737
TCGA-DD-AAEK	-295.549	814.229	518.68	0.776866
TCGA-DD-AAVP	-739.012	-505.173	-1244.19	0.912126
TCGA-DD-AAVQ	-473.085	1360.58	887.497	0.741655
TCGA-DD-AAVR	229.867	1005.26	1235.13	0.706476
TCGA-DD-AAVS	-793.282	-421.717	-1215	0.910362
TCGA-DD-AAVU	-1300.81	-498.943	-1799.76	0.942486
TCGA-DD-AAVV	-69.5543	738.251	668.697	0.762813
TCGA-DD-AAVW	142.234	157.373	299.608	0.796709
TCGA-DD-AAVX	-575.963	305.57	-270.394	0.84443
TCGA-DD-AAVY	-1247.07	-768.301	-2015.37	0.952591
TCGA-DD-AAVZ	-849.127	-465.724	-1314.85	0.916329
TCGA-DD-AAW0	-146.412	424.868	278.456	0.798582
TCGA-DD-AAW1	-1036.18	-609.931	-1646.11	0.934709
TCGA-DD-AAW2	-892.889	-753.862	-1646.75	0.934742
TCGA-DD-AAW3	-966.742	-816.879	-1783.62	0.941692
TCGA-ED-A459	-927.686	-0.326554	-928.013	0.892127
TCGA-ED-A4XI	44.7847	394.4	439.184	0.78416
TCGA-ED-A5KG	442.058	2633.56	3075.62	0.491964
TCGA-ED-A627	557.78	1147.01	1704.79	0.656044
TCGA-ED-A66X	201.88	277.198	479.079	0.780513
TCGA-ED-A66Y	-1263.63	-1242.36	-2505.99	0.972015
TCGA-ED-A7PX	-118.241	-263.195	-381.436	0.853048
TCGA-ED-A7PY	-1404.62	-782.443	-2187.06	0.959956
TCGA-ED-A7PZ	-1585.71	-1024.73	-2610.44	0.975502
TCGA-ED-A7XO	-310.473	53.406	-257.067	0.84338
TCGA-ED-A7XP	-444.134	-147.833	-591.967	0.868765
TCGA-ED-A82E	-575.019	-264.793	-839.811	0.886203
TCGA-ED-A8O5	-799.189	-754.67	-1553.86	0.929811
TCGA-ED-A8O6	-1056.9	-626.121	-1683.02	0.936621
TCGA-ED-A97K	-474.842	-134.841	-609.684	0.87005
TCGA-EP-A12J	-944.585	-477.191	-1421.78	0.922501
TCGA-EP-A26S	-966.179	-880.383	-1846.56	0.94476
TCGA-EP-A2KA	-916.659	734.961	-181.698	0.837384
TCGA-EP-A2KB	-1208.25	-568.134	-1776.38	0.941334
TCGA-EP-A2KC	-898.422	-472.179	-1370.6	0.919575
TCGA-EP-A3JL	-167.347	592.67	425.323	0.785421
TCGA-EP-A3RK	-247.284	1112.33	865.047	0.743862
TCGA-ES-A2HS	-612.376	-581.596	-1193.97	0.90908
TCGA-ES-A2HT	-332.408	86.8579	-245.55	0.842471
TCGA-FV-A23B	-745.446	-130.777	-876.224	0.888666
TCGA-FV-A2QQ	-585.849	162.274	-423.575	0.85626
TCGA-FV-A2QR	-312.771	-379.98	-692.75	0.875996
TCGA-FV-A3I0	-570.585	-231.173	-801.758	0.883601
TCGA-FV-A3I1	-453.315	285.141	-168.174	0.836298
TCGA-FV-A3R2	-1137.89	-403.618	-1541.5	0.929142
TCGA-FV-A3R3	365.458	193.336	558.793	0.773145
TCGA-FV-A495	-84.526	604.825	520.299	0.776716
TCGA-FV-A496	-1364.77	-971.269	-2336.04	0.965852
TCGA-FV-A4ZP	-866.601	644.086	-222.515	0.840644
TCGA-FV-A4ZQ	-1091.68	1088.89	-2.79172	0.822742
TCGA-G3-A25S	-1140.43	53.2637	-1087.16	0.902437
TCGA-G3-A25T	-607.053	-346.973	-954.026	0.893845
TCGA-G3-A25U	-1159.45	-721.799	-1881.25	0.946417
TCGA-G3-A25V	-81.4383	430.161	348.723	0.792331
TCGA-G3-A25X	-259.464	803.106	543.642	0.774553
TCGA-G3-A25Y	-299.784	-75.212	-374.996	0.852555
TCGA-G3-A25Z	-596.524	-130.073	-726.597	0.878381
TCGA-G3-A3CG	-517.583	-168.811	-686.394	0.875546
TCGA-G3-A3CH	-488.033	-59.084	-547.117	0.865486
TCGA-G3-A3CI	-418.531	232.854	-185.676	0.837703
TCGA-G3-A3CJ	-931.247	-353.902	-1285.15	0.914574
TCGA-G3-A3CK	-827.021	67.4652	-759.556	0.880683
TCGA-G3-A5SI	-1140.32	-897.19	-2037.51	0.953575
TCGA-G3-A5SJ	-717.099	448.408	-268.692	0.844296
TCGA-G3-A5SK	-436.338	314.738	-121.6	0.83253
TCGA-G3-A5SL	-763.475	-553.834	-1317.31	0.916473
TCGA-G3-A5SM	-64.7563	309.305	244.549	0.801567
TCGA-G3-A6UC	-1256.68	-729.719	-1986.4	0.951289
TCGA-G3-A7M5	-1049.96	-285.525	-1335.49	0.917538
TCGA-G3-A7M6	-748.91	-439.018	-1187.93	0.90871
TCGA-G3-A7M7	-909.315	-649.549	-1558.86	0.930081
TCGA-G3-A7M8	-383.688	-309.974	-693.662	0.87606
TCGA-G3-A7M9	-1448.36	-1069.74	-2518.1	0.972431
TCGA-G3-AAUZ	-521.599	323.413	-198.186	0.838705
TCGA-G3-AAV0	-909.794	-389.167	-1298.96	0.915392
TCGA-G3-AAV1	-823.292	-554.327	-1377.62	0.919979
TCGA-G3-AAV2	-894.859	-470.057	-1364.92	0.919247
TCGA-G3-AAV3	-474.594	631.851	157.256	0.809163
TCGA-G3-AAV4	-1022.16	-575.02	-1597.18	0.932132
TCGA-G3-AAV5	-1215.17	-473.768	-1688.94	0.936925
TCGA-G3-AAV6	-1206.85	-967.722	-2174.57	0.959441
TCGA-G3-AAV7	-757.713	210.034	-547.679	0.865527
TCGA-GJ-A3OU	841.654	2040.1	2881.76	0.516536
TCGA-GJ-A6C0	-613.942	438.585	-175.357	0.836875
TCGA-GJ-A9DB	-337.29	-258.284	-595.575	0.869027
TCGA-HP-A5MZ	486.086	832.343	1318.43	0.69777
TCGA-HP-A5N0	80.6803	-107.451	-26.7702	0.824738
TCGA-K7-A5RF	148.612	617.095	765.707	0.753528
TCGA-K7-A5RG	-308.678	1855.39	1546.71	0.673379
TCGA-K7-A6G5	-498.554	168.178	-330.375	0.849113
TCGA-K7-AAU7	-419.578	-75.957	-495.535	0.861668
TCGA-KR-A7K0	-664.668	-262.119	-926.787	0.892045
TCGA-KR-A7K2	-513.38	-92.1707	-605.55	0.869751
TCGA-KR-A7K7	-1262.74	534.738	-728.002	0.87848
TCGA-KR-A7K8	-300.637	920.784	620.147	0.767402
TCGA-LG-A6GG	-1162.69	-556.503	-1719.2	0.938468
TCGA-LG-A9QC	-1033.56	-863.094	-1896.65	0.947145
TCGA-LG-A9QD	-885.544	-99.2156	-984.76	0.895859
TCGA-MI-A75C	-1580.15	-42.3201	-1622.47	0.93347
TCGA-MI-A75E	-306.718	181.802	-124.916	0.832799
TCGA-MI-A75G	-1178.55	-795.622	-1974.18	0.950734
TCGA-MI-A75H	-643.116	350.369	-292.746	0.846183
TCGA-MI-A75I	-1250.3	-467.211	-1717.51	0.938382
TCGA-MR-A520	-805.709	-430.723	-1236.43	0.911659
TCGA-MR-A8JO	722.571	685.032	1407.6	0.688334
TCGA-NI-A4U2	-570.479	-382.257	-952.736	0.89376
TCGA-NI-A8LF	-485.615	-485.305	-970.92	0.894954
TCGA-O8-A75V	-353.604	486.456	132.852	0.811262
TCGA-PD-A5DF	20.5662	249.034	269.6	0.799363
TCGA-QA-A7B7	-1372.6	-590.709	-1963.31	0.950238
TCGA-RC-A6M4	-1367.96	-1040.15	-2408.1	0.968539
TCGA-RC-A6M5	249.801	-371.668	-121.867	0.832551
TCGA-RC-A6M6	-1460.17	-615.694	-2075.86	0.955255
TCGA-RC-A7S9	-1290.53	-122.92	-1413.45	0.922028
TCGA-RC-A7SB	-1152.98	-548.549	-1701.53	0.937569
TCGA-RC-A7SF	-1041.01	-347.942	-1388.95	0.92063
TCGA-RC-A7SH	-1309.84	-856.941	-2166.78	0.959118
TCGA-RC-A7SK	-1239.79	-862.03	-2101.81	0.956375
TCGA-RG-A7D4	-1237.6	821.616	-415.985	0.855684
TCGA-T1-A6J8	-609.104	-370.793	-979.897	0.895542
TCGA-UB-A7MA	-902.973	-592.446	-1495.42	0.926619
TCGA-UB-A7MB	-1268.9	-918.021	-2186.92	0.95995
TCGA-UB-A7MC	-1362.42	-934.498	-2296.92	0.964348
TCGA-UB-A7MD	-393.179	285.412	-107.767	0.831403
TCGA-UB-A7ME	-556.935	470.656	-86.2785	0.829646
TCGA-UB-A7MF	-713.144	1147.36	434.215	0.784613
TCGA-UB-AA0U	-61.0396	106.879	45.8397	0.818664
TCGA-UB-AA0V	20.8167	-38.134	-17.3173	0.823952
TCGA-WJ-A86L	-1413.78	-695.769	-2109.55	0.956706
TCGA-WQ-A9G7	-1346.43	-861.022	-2207.46	0.96079
TCGA-WQ-AB4B	-419.204	-32.0473	-451.251	0.858351
TCGA-WX-AA44	-1025.73	-222.172	-1247.9	0.91235
TCGA-WX-AA46	-394.256	-202.594	-596.85	0.86912
TCGA-WX-AA47	-1425.6	-866.598	-2292.2	0.964165
TCGA-XR-A8TC	-859.786	-650.258	-1510.04	0.927424
TCGA-XR-A8TD	265.167	1237.26	1502.43	0.67817
TCGA-XR-A8TE	-625.843	-481.048	-1106.89	0.90368
TCGA-XR-A8TF	-1173.1	-655.796	-1828.89	0.943907
TCGA-XR-A8TG	-587.848	-291.318	-879.166	0.888864
TCGA-YA-A8S7	-3.97374	1279.97	1276	0.702218
TCGA-ZP-A9CV	-255.856	277.662	21.8053	0.820685
TCGA-ZP-A9CY	-205.818	-25.3908	-231.209	0.841335
TCGA-ZP-A9CZ	-327.663	397.535	69.8726	0.816633
TCGA-ZP-A9D0	-797.929	-702.317	-1500.25	0.926885
TCGA-ZP-A9D1	-287.459	-32.7298	-320.188	0.848323
TCGA-ZP-A9D2	-595.091	-368.523	-963.614	0.894475
TCGA-ZP-A9D4	-1066.22	-725.14	-1791.37	0.942074
TCGA-ZS-A9CD	-398.253	26.1647	-372.088	0.852332
TCGA-ZS-A9CE	-1244.14	-913.527	-2157.67	0.958738
TCGA-ZS-A9CF	-933.692	-183.479	-1117.17	0.904326
TCGA-ZS-A9CG	-821.625	-477.377	-1299	0.915395
